# Supplementary material
Source: PubMed Central journal article supplement (PMC5922428)
Supplement: NIHMS927588-supplement-Supplemental_Digital_Content_1.pdf [file NIHMS927588-supplement-Supplemental_Digital_Content_1.pdf]

## Supplemental Digital Content

| <b>Coding System</b>                                                             | <b>Codes</b>                                | <b>Definition</b>                                                         |                                          |
|----------------------------------------------------------------------------------|---------------------------------------------|---------------------------------------------------------------------------|------------------------------------------|
| <b>ICD-9* Diagnosis Code</b>                                                     | 174.0                                       | Malignant neoplasm of female breast: nipple and areola                    |                                          |
|                                                                                  | 174.1                                       | Malignant neoplasm of female breast: central portion                      |                                          |
|                                                                                  | 174.2                                       | Malignant neoplasm of female breast: upper inner-quadrant                 |                                          |
|                                                                                  | 174.3                                       | Malignant neoplasm of female breast: lower-inner quadrant                 |                                          |
|                                                                                  | 174.4                                       | Malignant neoplasm of female breast: upper-outer quadrant                 |                                          |
|                                                                                  | 174.5                                       | Malignant neoplasm of female breast: lower-outer quadrant                 |                                          |
|                                                                                  | 174.6                                       | Malignant neoplasm of female breast: axillary tail                        |                                          |
|                                                                                  | 174.8                                       | Malignant neoplasm of female breast: other sites                          |                                          |
|                                                                                  | 174.9                                       | Malignant neoplasm of female breast: unspecified                          |                                          |
|                                                                                  | 233.0                                       | Carcinoma in situ of breast                                               |                                          |
|                                                                                  | 238.3                                       | Neoplasm of uncertain behavior of breast                                  |                                          |
|                                                                                  | 239.3                                       | Neoplasm of unspecified nature of breast                                  |                                          |
|                                                                                  | <b>ICD-9* Procedure Code for Mastectomy</b> | 85.34                                                                     | Other unilateral subcutaneous mastectomy |
|                                                                                  |                                             | 85.36                                                                     | Other bilateral subcutaneous mastectomy  |
|                                                                                  |                                             | 85.4                                                                      | Mastectomy                               |
| 85.41                                                                            |                                             | Unilateral simple mastectomy                                              |                                          |
| 85.42                                                                            |                                             | Bilateral simple mastectomy                                               |                                          |
| 85.43                                                                            |                                             | Unilateral extended simple mastectomy                                     |                                          |
| 85.44                                                                            |                                             | Bilateral extended simple mastectomy                                      |                                          |
| 85.45                                                                            |                                             | Unilateral radical mastectomy                                             |                                          |
| 85.46                                                                            |                                             | Bilateral radical mastectomy                                              |                                          |
| 85.47                                                                            |                                             | Unilateral extended radical mastectomy                                    |                                          |
| 85.48                                                                            |                                             | Bilateral extended radical mastectomy                                     |                                          |
| V50.41                                                                           | Prophylactic removal of breast              |                                                                           |                                          |
| <b>CPT<sup>†</sup> Code for Mastectomy</b>                                       | 19180                                       | Simple complete mastectomy                                                |                                          |
|                                                                                  | 19182                                       | Subcutaneous mastectomy                                                   |                                          |
|                                                                                  | 19200                                       | Radical mastectomy                                                        |                                          |
|                                                                                  | 19240                                       | Modified radical mastectomy                                               |                                          |
|                                                                                  | 19303                                       | Simple complete mastectomy                                                |                                          |
|                                                                                  | 19304                                       | Subcutaneous mastectomy                                                   |                                          |
|                                                                                  | 19305                                       | Radical mastectomy with ALND                                              |                                          |
|                                                                                  | 19306                                       | Radical mastectomy with ALND and internal mammary lymph node (urban-type) |                                          |
|                                                                                  | 19307                                       | Modified radical mastectomy                                               |                                          |
| <b>ICD-9* Procedure Code and CPT<sup>†</sup> code for Implant Reconstruction</b> | 85.33                                       | Unilateral mastectomy with synchronous immediate implant                  |                                          |
|                                                                                  | 85.93                                       |                                                                           |                                          |
|                                                                                  | 86.95                                       |                                                                           |                                          |
|                                                                                  | 19340                                       |                                                                           |                                          |
|                                                                                  | 19342                                       |                                                                           |                                          |
|                                                                                  | 19357                                       |                                                                           |                                          |
|                                                                                  | 85.35                                       | Bilateral mastectomy with synchronous immediate implant                   |                                          |
|                                                                                  | 85.53                                       | Unilateral breast implant                                                 |                                          |
|                                                                                  | 85.54                                       | Bilateral breast implant                                                  |                                          |

|                                                                                      |                                  |                                                            |
|--------------------------------------------------------------------------------------|----------------------------------|------------------------------------------------------------|
| <b>ICD-9* Procedure Code<br/>and CPT† code for<br/>Autologous<br/>Reconstruction</b> | 85.7                             | Total autologous reconstruction of the breast              |
|                                                                                      | 85.70                            | Not otherwise specified, perforator/free flap              |
|                                                                                      | 85.71<br>19361                   | Latissimus dorsi Flap                                      |
|                                                                                      | 85.73<br>19367<br>19368<br>19369 | Transverse rectus abdominis myocutaneous (TRAM) flap, free |
|                                                                                      | 85.74                            | Deep inferior epigastric perforator (DIEP) flap, free      |
|                                                                                      | 85.75                            | Superficial inferior epigastric artery (SIEA) flap, free   |
|                                                                                      | 85.76<br>S2066                   | Gluteal artery perforator (GAP) flap, free                 |
|                                                                                      | 85.84                            | Pedicle graft                                              |
|                                                                                      | 85.85                            | Muscle flap graft                                          |
|                                                                                      | 15734                            | Muscle, myocutaneous, fasciocutaneous flap of trunk        |
|                                                                                      | 15740                            | Island pedicle                                             |
|                                                                                      | 19364                            | Breast reconstruction with free flap                       |
|                                                                                      | S2067                            | Stacked DIEP or GAP flap                                   |
|                                                                                      | S2068                            | DIEP or SIEA                                               |

\* International Classification of Disease, Ninth Revision, Clinical Modification

† Current Procedural Terminal
